# Supplementary material
Source: PubMed Central journal article supplement (PMC196890)
Supplement: pnas_100_19_10842__1.pdf [file pnas_100_19_10842__1.pdf]

## Appendix 1: Description of the Determination of Arbitrary Parameters

1. How was the cutoff value for the significant coefficient value ( $a_{ii} / \sum_j a_{ij}$ ) determined?

The cutoff values were scanned in the range as shown ( $k = 4$ ). For each case, there was a broad range of the cutoff value that did not change the number of links (79 for Fig. 2 *B* and *C*, 52 for Fig. 2*D*). The cutoff value of 0.001 was chosen because this value was in the stable range.

For Fig. 2 *B* and *C*

| Cutoff  | Number of links |
|---------|-----------------|
| 0       | 104             |
| 0.0001  | 79              |
| 0.00033 | 79              |
| 0.001   | 79              |
| 0.0033  | 79              |
| 0.01    | 79              |
| 0.033   | 76              |
| 0.1     | 68              |
| 0.33    | 33              |

For Fig. 2*D*

| Cutoff  | Number of links |
|---------|-----------------|
| 0       | 66              |
| 0.0001  | 52              |
| 0.00033 | 52              |
| 0.001   | 52              |
| 0.0033  | 52              |
| 0.01    | 50              |
| 0.033   | 47              |
| 0.1     | 40              |
| 0.33    | 21              |

2. How was the cutoff value for bootstrap analysis decided?

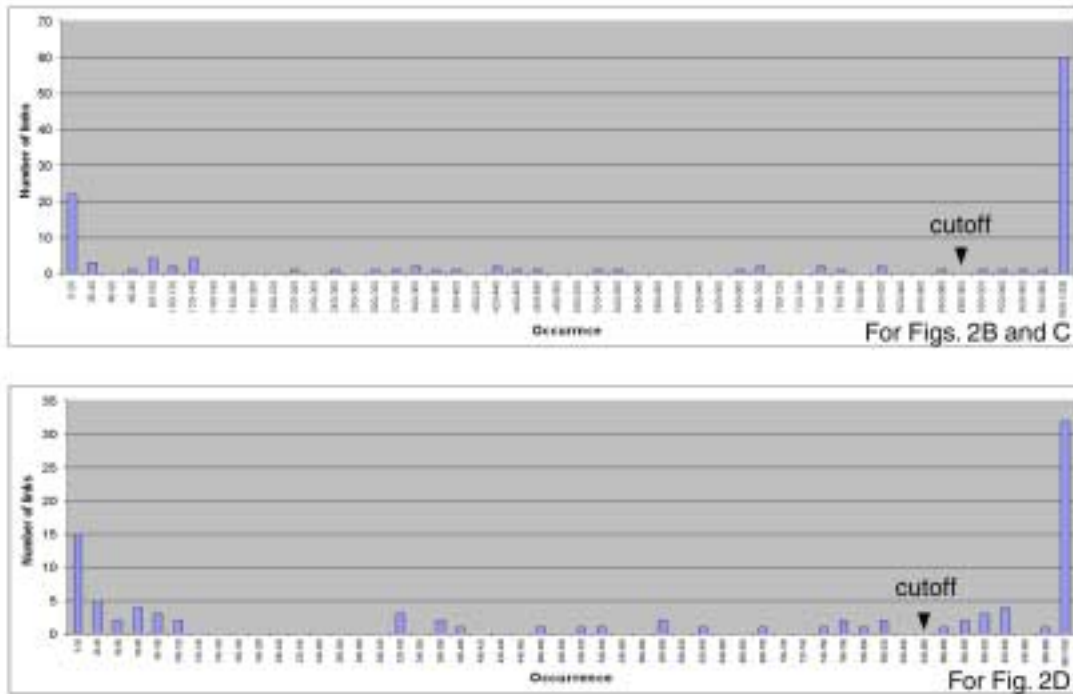

Histogram of the number of links for certain ranges of the occurrence during 1,000 bootstrapped trials. (*Upper*) Data used in Fig. 2 B and C; (*Lower*) data used in Fig. 2D. On the basis of the distribution, the cutoff point was decided as shown for each case.  $K = 4, a_{ii} / \sum_j a_{ij} \geq 0.001$
